# Supplementary material
Source: publisher figshare collection journal article supplement (https://acs.figshare.com/ndownloader/files/25567068)
Supplement: Supplementary file 1 [file 25567068]

## Sheet: READ ME
Notes on Format of Excel Tables
Articles highlighted in blue did not report their total tests and only reported positives.
Articles highlighted in orange appeared in other sections.
Data is reported in three columns for each surface type. The first is the number of positive results, the second is the total number of tests, and the third is the surface that was tested.

## Sheet: 1.Healthcare
										COVID Patient Room	COVID Patient Room	COVID Patient Room	COVID Patient Room	Patient Room	COVID Patient Room	COVID Patient Room	COVID Patient Room	COVID Patient Room	COVID Patient Room	COVID Patient Room	COVID Patient Room	COVID Patient Room	COVID Patient Room	COVID Patient Room	COVID Patient Room	COVID Patient Room	COVID Patient Room	COVID Patient Room	COVID Patient Room	COVID Patient Room	COVID Patient Room	COVID Patient Room	COVID Patient Room	COVID Patient Room	COVID Patient Room	COVID Patient Room	COVID Patient Room	COVID Patient Room	COVID Patient Room	COVID Patient Room	COVID Patient Room	COVID Patient Room	COVID Patient Room	COVID Patient Room	COVID Patient Room	COVID Patient Room	COVID Patient Room	COVID Patient Room	COVID Patient Room
Source Number	Title	Author	Peer Reviewed	Tested Infectivity	Reported Prior Disinfection	Disinfection Notes	Change After Disinfection	Country	Setting and Discussion Notes	P:Hard Bed	Total	Note	P:Soft Bed	Total	Note	P:Unspecified Bed	Total	Note	P:Floor	Total	Note	P:Non-Floor	Total	Note	P:Hard Furniture	Total	Note	P:Bathroom	Total	Note	P:Personal Electronic Devices	Total	Note	P:Electronic HTS	Total	Note	P:Non-E HTS	Total	Note	P:HVAC	Total	Note	P:Food/Utensils	Total	Note	P: Attached Medical Equipment	Total	Note	P:Unspec Medical
85	Environmental contamination by SARS-CoV-2 in a designated hospital for coronavirus disease 2019.	Wu, Songjie;Wang, Ying;Jin, Xuelan;Tian, Jia;Liu, Jianzhong;Mao, Yiping	Y	N	Y	routine		China	COVID hospital	1	7	bedrails
85	Environmental contamination by SARS-CoV-2 in a designated hospital for coronavirus disease 2019.	Wu, Songjie;Wang, Ying;Jin, Xuelan;Tian, Jia;Liu, Jianzhong;Mao, Yiping	Y							1	7	bedside tables
85	Environmental contamination by SARS-CoV-2 in a designated hospital for coronavirus disease 2019.	Wu, Songjie;Wang, Ying;Jin, Xuelan;Tian, Jia;Liu, Jianzhong;Mao, Yiping	Y
86	Do established infection prevention and control measures prevent spread of SARS-CoV-2 to the hospital environment beyond the patient room?	Jerry, Jincy;O'Regan, Edel;O'Sullivan, Louise;Lynch, Maureen;Brady, Deirdre	Y	N	Y		presence/absence	Ireland	hospital with national ward for highly contagious disease	4	6	bed rail													1	4	patient chair-arm	0	4	toilet door handle							1	4	call bell
86	Do established infection prevention and control measures prevent spread of SARS-CoV-2 to the hospital environment beyond the patient room?	Jerry, Jincy;O'Regan, Edel;O'Sullivan, Louise;Lynch, Maureen;Brady, Deirdre	Y							3	6	bedside table
86	Do established infection prevention and control measures prevent spread of SARS-CoV-2 to the hospital environment beyond the patient room?	Jerry, Jincy;O'Regan, Edel;O'Sullivan, Louise;Lynch, Maureen;Brady, Deirdre	Y							2	2	remote for bed
87	Surface Distribution of Severe Acute Respiratory Syndrome Coronavirus 2 in a Negative Pressure Ward at an Urgently Field Hospital	Wang, YQ, Fu; Zhou, Fuling; Li, Yang; Zhu, Xiaoping; Liu, Linlin; Xie, Wen; Zeng, Qili; Cheng, Xiaohuan; Wu, Wenwen; Yang, Jinru; Yuan, Yufeng	N	N	N			China	general ward and ICU ward	0	1	bedstand							0	2	Ground				0	1	dustbin	0	1	dirty washing room										0	2	air outlet				0	1	infusion pump	1
87	Surface Distribution of Severe Acute Respiratory Syndrome Coronavirus 2 in a Negative Pressure Ward at an Urgently Field Hospital	Wang, YQ, Fu; Zhou, Fuling; Li, Yang; Zhu, Xiaoping; Liu, Linlin; Xie, Wen; Zeng, Qili; Cheng, Xiaohuan; Wu, Wenwen; Yang, Jinru; Yuan, Yufeng	N							0	2	bedrail
87	Surface Distribution of Severe Acute Respiratory Syndrome Coronavirus 2 in a Negative Pressure Ward at an Urgently Field Hospital	Wang, YQ, Fu; Zhou, Fuling; Li, Yang; Zhu, Xiaoping; Liu, Linlin; Xie, Wen; Zeng, Qili; Cheng, Xiaohuan; Wu, Wenwen; Yang, Jinru; Yuan, Yufeng	N							0	1	bedside cupboard
87	Surface Distribution of Severe Acute Respiratory Syndrome Coronavirus 2 in a Negative Pressure Ward at an Urgently Field Hospital	Wang, YQ, Fu; Zhou, Fuling; Li, Yang; Zhu, Xiaoping; Liu, Linlin; Xie, Wen; Zeng, Qili; Cheng, Xiaohuan; Wu, Wenwen; Yang, Jinru; Yuan, Yufeng	N
87	Surface Distribution of Severe Acute Respiratory Syndrome Coronavirus 2 in a Negative Pressure Ward at an Urgently Field Hospital	Wang, YQ, Fu; Zhou, Fuling; Li, Yang; Zhu, Xiaoping; Liu, Linlin; Xie, Wen; Zeng, Qili; Cheng, Xiaohuan; Wu, Wenwen; Yang, Jinru; Yuan, Yufeng	N
87	Surface Distribution of Severe Acute Respiratory Syndrome Coronavirus 2 in a Negative Pressure Ward at an Urgently Field Hospital	Wang, YQ, Fu; Zhou, Fuling; Li, Yang; Zhu, Xiaoping; Liu, Linlin; Xie, Wen; Zeng, Qili; Cheng, Xiaohuan; Wu, Wenwen; Yang, Jinru; Yuan, Yufeng	N
88	SARS-CoV-2 environmental contamination associated with persistently infected COVID-19 patients.	Lei, Hui;Ye, Feng;Liu, Xiaoqing;Huang, Zhenting;Ling, Shiman;Jiang, Zhanpeng;Cheng, Jing;Huang, Xiaoqun;Wu, Qiubao;Wu, Shiguan;Xie, Yanmin;Xiao, Cheng;Ye, Dan;Yang, Zifeng;Li, Yimin;Leung, Nancy H L;Cowling, Benjamin J;He, Jianxing;Wong, Sook-San;Zanin, Mark	Y	N	N			China	The First Affiliated Hospital of Guangzhou Medical University																			0	1	Toilet
88	SARS-CoV-2 environmental contamination associated with persistently infected COVID-19 patients.	Lei, Hui;Ye, Feng;Liu, Xiaoqing;Huang, Zhenting;Ling, Shiman;Jiang, Zhanpeng;Cheng, Jing;Huang, Xiaoqun;Wu, Qiubao;Wu, Shiguan;Xie, Yanmin;Xiao, Cheng;Ye, Dan;Yang, Zifeng;Li, Yimin;Leung, Nancy H L;Cowling, Benjamin J;He, Jianxing;Wong, Sook-San;Zanin, Mark	Y																									0	1	Bathroom door handle
88	SARS-CoV-2 environmental contamination associated with persistently infected COVID-19 patients.	Lei, Hui;Ye, Feng;Liu, Xiaoqing;Huang, Zhenting;Ling, Shiman;Jiang, Zhanpeng;Cheng, Jing;Huang, Xiaoqun;Wu, Qiubao;Wu, Shiguan;Xie, Yanmin;Xiao, Cheng;Ye, Dan;Yang, Zifeng;Li, Yimin;Leung, Nancy H L;Cowling, Benjamin J;He, Jianxing;Wong, Sook-San;Zanin, Mark	Y																									0	1	sink faucet handles
88	SARS-CoV-2 environmental contamination associated with persistently infected COVID-19 patients.	Lei, Hui;Ye, Feng;Liu, Xiaoqing;Huang, Zhenting;Ling, Shiman;Jiang, Zhanpeng;Cheng, Jing;Huang, Xiaoqun;Wu, Qiubao;Wu, Shiguan;Xie, Yanmin;Xiao, Cheng;Ye, Dan;Yang, Zifeng;Li, Yimin;Leung, Nancy H L;Cowling, Benjamin J;He, Jianxing;Wong, Sook-San;Zanin, Mark	Y
89	SARS-CoV-2 RNA detection in the air and on surfaces in the COVID-19 ward of a hospital in Milan, Italy.	Razzini, Katia;Castrica, Marta;Menchetti, Laura;Maggi, Lorenzo;Negroni, Lucia;Orfeo, Nicola V;Pizzoccheri, Alice;Stocco, Matteo;Muttini, Stefano;Balzaretti, Claudia M	Y	N	N			Italy	San Carlo Hospital in Milan, Lombardy	1	3	bedrails
89	SARS-CoV-2 RNA detection in the air and on surfaces in the COVID-19 ward of a hospital in Milan, Italy.	Razzini, Katia;Castrica, Marta;Menchetti, Laura;Maggi, Lorenzo;Negroni, Lucia;Orfeo, Nicola V;Pizzoccheri, Alice;Stocco, Matteo;Muttini, Stefano;Balzaretti, Claudia M	Y
89	SARS-CoV-2 RNA detection in the air and on surfaces in the COVID-19 ward of a hospital in Milan, Italy.	Razzini, Katia;Castrica, Marta;Menchetti, Laura;Maggi, Lorenzo;Negroni, Lucia;Orfeo, Nicola V;Pizzoccheri, Alice;Stocco, Matteo;Muttini, Stefano;Balzaretti, Claudia M	Y
89	SARS-CoV-2 RNA detection in the air and on surfaces in the COVID-19 ward of a hospital in Milan, Italy.	Razzini, Katia;Castrica, Marta;Menchetti, Laura;Maggi, Lorenzo;Negroni, Lucia;Orfeo, Nicola V;Pizzoccheri, Alice;Stocco, Matteo;Muttini, Stefano;Balzaretti, Claudia M	Y
89	SARS-CoV-2 RNA detection in the air and on surfaces in the COVID-19 ward of a hospital in Milan, Italy.	Razzini, Katia;Castrica, Marta;Menchetti, Laura;Maggi, Lorenzo;Negroni, Lucia;Orfeo, Nicola V;Pizzoccheri, Alice;Stocco, Matteo;Muttini, Stefano;Balzaretti, Claudia M	Y
90	Monitoring environmental contamination caused by SARS-CoV-2 in a healthcare facility by using adenosine triphosphate testing	Lee, Y-MKYJKDYPK-HLMS	Y	N	Y	daily cleaning		South Korea	tertiary care hospital	0	1	Bedrail	0	1	bed mattress				0	1	Floor							0	1	door handle of bathroom	0	1	cellphone	0	1	remote control	0	1	Light Switch at Wall										0
90	Monitoring environmental contamination caused by SARS-CoV-2 in a healthcare facility by using adenosine triphosphate testing	Lee, Y-MKYJKDYPK-HLMS	Y							0	1	Light Switch at bed	0	1	pillow													0	1	light switch at bathroom				0	1	television screen	0	1	Door handle of refrigerator										0
90	Monitoring environmental contamination caused by SARS-CoV-2 in a healthcare facility by using adenosine triphosphate testing	Lee, Y-MKYJKDYPK-HLMS	Y							0	1	call bell at bed																0	1	toilet seat cover																			0
90	Monitoring environmental contamination caused by SARS-CoV-2 in a healthcare facility by using adenosine triphosphate testing	Lee, Y-MKYJKDYPK-HLMS	Y							0	1	bedside table																0	1	shower handle at bathroom																			0
90	Monitoring environmental contamination caused by SARS-CoV-2 in a healthcare facility by using adenosine triphosphate testing	Lee, Y-MKYJKDYPK-HLMS	Y							0	1	telephone at bedside table																0	1	water tap at bathroom
90	Monitoring environmental contamination caused by SARS-CoV-2 in a healthcare facility by using adenosine triphosphate testing	Lee, Y-MKYJKDYPK-HLMS	Y							0	1	bed headboard																0	1	sink at bathroom
91	Environmental Surface Testing for Severe Acute Respiratory Syndrome Coronavirus 2 (SARS-CoV-2) during Prolonged Isolation of an Asymptomatic Carrier	Shin, KSP, H. S.; Lee, J.; Lee, J. K.	Y	N	Y	4 days prior to test		South Korea	community treatment center	0	2	bedside tables							0	1	floor							0	1	sink/toilet bowl (ceramic)	0	2	mobile phones				0	1	wall panel/door handle
91	Environmental Surface Testing for Severe Acute Respiratory Syndrome Coronavirus 2 (SARS-CoV-2) during Prolonged Isolation of an Asymptomatic Carrier	Shin, KSP, H. S.; Lee, J.; Lee, J. K.	Y							0	1	entire length of bed rail																			0	1	tablet
91	Environmental Surface Testing for Severe Acute Respiratory Syndrome Coronavirus 2 (SARS-CoV-2) during Prolonged Isolation of an Asymptomatic Carrier	Shin, KSP, H. S.; Lee, J.; Lee, J. K.	Y							0	1	call bell attached to the bed
92	Asymptomatic COVID-19 Patients Can Contaminate Their Surroundings: an Environment Sampling Study.	Wei, Li;Lin, Ji;Duan, Xiaofei;Huang, Wenzhi;Lu, Xiaojun;Zhou, Juan;Zong, Zhiyong	Y	N	Y	twice daily cleaning		China	designated isolation ward	7	13	bedrail	6	12	pillow																						2	6	door handle
92	Asymptomatic COVID-19 Patients Can Contaminate Their Surroundings: an Environment Sampling Study.	Wei, Li;Lin, Ji;Duan, Xiaofei;Huang, Wenzhi;Lu, Xiaojun;Zhou, Juan;Zong, Zhiyong	Y							4	11	bedside tables	6	12	bedsheet
92	Asymptomatic COVID-19 Patients Can Contaminate Their Surroundings: an Environment Sampling Study.	Wei, Li;Lin, Ji;Duan, Xiaofei;Huang, Wenzhi;Lu, Xiaojun;Zhou, Juan;Zong, Zhiyong	Y
92	Asymptomatic COVID-19 Patients Can Contaminate Their Surroundings: an Environment Sampling Study.	Wei, Li;Lin, Ji;Duan, Xiaofei;Huang, Wenzhi;Lu, Xiaojun;Zhou, Juan;Zong, Zhiyong	Y
92	Asymptomatic COVID-19 Patients Can Contaminate Their Surroundings: an Environment Sampling Study.	Wei, Li;Lin, Ji;Duan, Xiaofei;Huang, Wenzhi;Lu, Xiaojun;Zhou, Juan;Zong, Zhiyong	Y
92	Asymptomatic COVID-19 Patients Can Contaminate Their Surroundings: an Environment Sampling Study.	Wei, Li;Lin, Ji;Duan, Xiaofei;Huang, Wenzhi;Lu, Xiaojun;Zhou, Juan;Zong, Zhiyong	Y
93	SARS-CoV-2 RNA Detection on Disposable Wooden Chopsticks, Hong Kong	Lui, GL, C. K. C.; Chen, Z.; Tong, S. L. Y.; Ho, W. C. S.; Yeung, A. C. M.; Boon, S. S.; Ng, R. W. Y.; Chan, P. K. S.	Y	N	N			China	hospital																																		5	5	wooden chopsticks
94	SARS-CoV-2 RNA contamination of inanimate surfaces and virus viability in a health care emergency unit	Colaneri, MS, E.; Novati, S.; Asperges, E.; Biscarini, S.; Piralla, A.; Percivalle, E.; Cassaniti, I.; Baldanti, F.; Bruno, R.; Mondelli, M. U.	Y	N	Y	4 hours post cleaning		Italy	sub-intensive care unit and emergency unit	0	2	bedrails				0	1	beds							0	2	table	0	1	door knobs and water taps in patients toilets																0	2	infusion pump
94	SARS-CoV-2 RNA contamination of inanimate surfaces and virus viability in a health care emergency unit	Colaneri, MS, E.; Novati, S.; Asperges, E.; Biscarini, S.; Piralla, A.; Percivalle, E.; Cassaniti, I.; Baldanti, F.; Bruno, R.; Mondelli, M. U.	Y			sodium hypochlorite at 1000 ppM of free chlorine										0	1	bed of patient with CPAP helmet																												0	2	multi-parameter monitor
94	SARS-CoV-2 RNA contamination of inanimate surfaces and virus viability in a health care emergency unit	Colaneri, MS, E.; Novati, S.; Asperges, E.; Biscarini, S.; Piralla, A.; Percivalle, E.; Cassaniti, I.; Baldanti, F.; Bruno, R.; Mondelli, M. U.	Y																																											0	1	CPAP helmet, exterior surface
94	SARS-CoV-2 RNA contamination of inanimate surfaces and virus viability in a health care emergency unit	Colaneri, MS, E.; Novati, S.; Asperges, E.; Biscarini, S.; Piralla, A.; Percivalle, E.; Cassaniti, I.; Baldanti, F.; Bruno, R.; Mondelli, M. U.	Y
94	SARS-CoV-2 RNA contamination of inanimate surfaces and virus viability in a health care emergency unit	Colaneri, MS, E.; Novati, S.; Asperges, E.; Biscarini, S.; Piralla, A.; Percivalle, E.; Cassaniti, I.; Baldanti, F.; Bruno, R.; Mondelli, M. U.	Y
94	SARS-CoV-2 RNA contamination of inanimate surfaces and virus viability in a health care emergency unit	Colaneri, MS, E.; Novati, S.; Asperges, E.; Biscarini, S.; Piralla, A.; Percivalle, E.; Cassaniti, I.; Baldanti, F.; Bruno, R.; Mondelli, M. U.	Y
94	SARS-CoV-2 RNA contamination of inanimate surfaces and virus viability in a health care emergency unit	Colaneri, MS, E.; Novati, S.; Asperges, E.; Biscarini, S.; Piralla, A.; Percivalle, E.; Cassaniti, I.; Baldanti, F.; Bruno, R.; Mondelli, M. U.	Y
95	Environmental cleaning is effective for the eradication of severe acute respiratory syndrome coronavirus 2 (SARS-CoV-2) in contaminated hospital rooms: A patient from the Diamond Princess cruise ship.	Yosuke Hirotsu, Makoto Maejima, Masumi Nakajima, Hitoshi Mochizuki, Masao Omata	Y	N	Y	disinfectant Rely On Vikron		Japan	general hospital	0	1	nurse call attached to bed																0	1	toilet door handle							0	2	light switch										0
95	Environmental cleaning is effective for the eradication of severe acute respiratory syndrome coronavirus 2 (SARS-CoV-2) in contaminated hospital rooms: A patient from the Diamond Princess cruise ship.	Yosuke Hirotsu, Makoto Maejima, Masumi Nakajima, Hitoshi Mochizuki, Masao Omata	Y							0	2	bed guard																0	1	sink, external rim, and bowl							0	1	door handle
95	Environmental cleaning is effective for the eradication of severe acute respiratory syndrome coronavirus 2 (SARS-CoV-2) in contaminated hospital rooms: A patient from the Diamond Princess cruise ship.	Yosuke Hirotsu, Makoto Maejima, Masumi Nakajima, Hitoshi Mochizuki, Masao Omata	Y							0	1	bed desk																									0	1	nurse call
95	Environmental cleaning is effective for the eradication of severe acute respiratory syndrome coronavirus 2 (SARS-CoV-2) in contaminated hospital rooms: A patient from the Diamond Princess cruise ship.	Yosuke Hirotsu, Makoto Maejima, Masumi Nakajima, Hitoshi Mochizuki, Masao Omata	Y																																		0	1	hand soap dispenser
96	Clinical Data on Hospital Environmental Hygiene Monitoring and Medical Staff Protection during the Coronavirus Disease 2019 Outbreak	Jiang, Yanfang;Wang, Haifeng;Chen, Yukun;He, Jiaxue;Chen, Liguo;Liu, Yong;Hu, Xinyuan;Li, Ang;Liu, Siwen;Zhang, Peng;Zou, Hongyan;Hua, Shucheng	N	N	N			China	first hospital of Jilin University													0	16	window frames				0	16	sides of a toilet handle							0	16	door handle
96	Clinical Data on Hospital Environmental Hygiene Monitoring and Medical Staff Protection during the Coronavirus Disease 2019 Outbreak	Jiang, Yanfang;Wang, Haifeng;Chen, Yukun;He, Jiaxue;Chen, Liguo;Liu, Yong;Hu, Xinyuan;Li, Ang;Liu, Siwen;Zhang, Peng;Zou, Hongyan;Hua, Shucheng	N
96	Clinical Data on Hospital Environmental Hygiene Monitoring and Medical Staff Protection during the Coronavirus Disease 2019 Outbreak	Jiang, Yanfang;Wang, Haifeng;Chen, Yukun;He, Jiaxue;Chen, Liguo;Liu, Yong;Hu, Xinyuan;Li, Ang;Liu, Siwen;Zhang, Peng;Zou, Hongyan;Hua, Shucheng	N
96	Clinical Data on Hospital Environmental Hygiene Monitoring and Medical Staff Protection during the Coronavirus Disease 2019 Outbreak	Jiang, Yanfang;Wang, Haifeng;Chen, Yukun;He, Jiaxue;Chen, Liguo;Liu, Yong;Hu, Xinyuan;Li, Ang;Liu, Siwen;Zhang, Peng;Zou, Hongyan;Hua, Shucheng	N
96	Clinical Data on Hospital Environmental Hygiene Monitoring and Medical Staff Protection during the Coronavirus Disease 2019 Outbreak	Jiang, Yanfang;Wang, Haifeng;Chen, Yukun;He, Jiaxue;Chen, Liguo;Liu, Yong;Hu, Xinyuan;Li, Ang;Liu, Siwen;Zhang, Peng;Zou, Hongyan;Hua, Shucheng	N
96	Clinical Data on Hospital Environmental Hygiene Monitoring and Medical Staff Protection during the Coronavirus Disease 2019 Outbreak	Jiang, Yanfang;Wang, Haifeng;Chen, Yukun;He, Jiaxue;Chen, Liguo;Liu, Yong;Hu, Xinyuan;Li, Ang;Liu, Siwen;Zhang, Peng;Zou, Hongyan;Hua, Shucheng	N
96	Clinical Data on Hospital Environmental Hygiene Monitoring and Medical Staff Protection during the Coronavirus Disease 2019 Outbreak	Jiang, Yanfang;Wang, Haifeng;Chen, Yukun;He, Jiaxue;Chen, Liguo;Liu, Yong;Hu, Xinyuan;Li, Ang;Liu, Siwen;Zhang, Peng;Zou, Hongyan;Hua, Shucheng	N
97	Air, Surface Environmental, and Personal Protective Equipment Contamination by Severe Acute Respiratory Syndrome Coronavirus 2 (SARS-CoV-2) From a Symptomatic Patient	Ong, SWXT, Y. K.; Chia, P. Y.; Lee, T. H.; Ng, O. T.; Wong, M. S. Y.; Marimuthu, K.	Y	N	Y	twice daily	results from rooms that had just been cleaned were all negative	Singapore	Airborn infection isolation room	1	3	cardiac table							1	3	floor	1	3	window	1	3	chair	1	3	door handle							1	3	locker with hand slot	2	9	air outlet fan							1
97	Air, Surface Environmental, and Personal Protective Equipment Contamination by Severe Acute Respiratory Syndrome Coronavirus 2 (SARS-CoV-2) From a Symptomatic Patient	Ong, SWXT, Y. K.; Chia, P. Y.; Lee, T. H.; Ng, O. T.; Wong, M. S. Y.; Marimuthu, K.	Y				cleaning seems effective; risk from footwear likely low as anteroom hallway was clean			1	3	bedrail										1	3	glass door				1	3	toilet bowl
97	Air, Surface Environmental, and Personal Protective Equipment Contamination by Severe Acute Respiratory Syndrome Coronavirus 2 (SARS-CoV-2) From a Symptomatic Patient	Ong, SWXT, Y. K.; Chia, P. Y.; Lee, T. H.; Ng, O. T.; Wong, M. S. Y.; Marimuthu, K.	Y							0	3	control panel																0	3	handrail
97	Air, Surface Environmental, and Personal Protective Equipment Contamination by Severe Acute Respiratory Syndrome Coronavirus 2 (SARS-CoV-2) From a Symptomatic Patient	Ong, SWXT, Y. K.; Chia, P. Y.; Lee, T. H.; Ng, O. T.; Wong, M. S. Y.; Marimuthu, K.	Y							0	3	call bell																0	3	sink rim
97	Air, Surface Environmental, and Personal Protective Equipment Contamination by Severe Acute Respiratory Syndrome Coronavirus 2 (SARS-CoV-2) From a Symptomatic Patient	Ong, SWXT, Y. K.; Chia, P. Y.; Lee, T. H.; Ng, O. T.; Wong, M. S. Y.; Marimuthu, K.	Y							1	3	light switches behind bed																1	3	sink bowl
98	Absence of contamination of personal protective equipment (PPE) by Severe Acute Respiratory Syndrome Coronavirus 2 (SARS-CoV-2)	Ong, SWXT, Yian Kim; Sutjipto, Stephanie; Chia, Po Ying; Young, Barnaby Edward; Gum, Marcus; Lau, Sok Kiang; Chan, Monica; Vasoo, Shawn; Mendis, Shehara; Toh, Boon Kiat; Leong, Janice; Barkham, Timothy; Ang, Brenda Sze Peng; Tan, Boon Huan; Leo, Yee-Sin; Marimuthu, Kalisvar; Wong, Michelle Su Yen; Ng, Oon Tek	Y	N	N			Singapore	PPE sampling study
98	Absence of contamination of personal protective equipment (PPE) by Severe Acute Respiratory Syndrome Coronavirus 2 (SARS-CoV-2)	Ong, SWXT, Yian Kim; Sutjipto, Stephanie; Chia, Po Ying; Young, Barnaby Edward; Gum, Marcus; Lau, Sok Kiang; Chan, Monica; Vasoo, Shawn; Mendis, Shehara; Toh, Boon Kiat; Leong, Janice; Barkham, Timothy; Ang, Brenda Sze Peng; Tan, Boon Huan; Leo, Yee-Sin; Marimuthu, Kalisvar; Wong, Michelle Su Yen; Ng, Oon Tek	Y						limitation: surface swab rather than full extraction with detergents etc from PPE; air exchange was very high (12)
98	Absence of contamination of personal protective equipment (PPE) by Severe Acute Respiratory Syndrome Coronavirus 2 (SARS-CoV-2)	Ong, SWXT, Yian Kim; Sutjipto, Stephanie; Chia, Po Ying; Young, Barnaby Edward; Gum, Marcus; Lau, Sok Kiang; Chan, Monica; Vasoo, Shawn; Mendis, Shehara; Toh, Boon Kiat; Leong, Janice; Barkham, Timothy; Ang, Brenda Sze Peng; Tan, Boon Huan; Leo, Yee-Sin; Marimuthu, Kalisvar; Wong, Michelle Su Yen; Ng, Oon Tek	Y						found no contamination on N95, goggles, shoes(shoes references older study)
99	Environment and Personal Protective Equipment Tests for SARS-CoV-2 in the Isolation Room of an Infant With Infection	Yung, CFK, K. Q.; Wong, M. S. Y.; Maiwald, M.; Tan, Y. K.; Tan, B. H.; Thoon, K. C.	Y	N	N			Singapore	Infant Room	1	1	bedrail	1	1	bedding										1	1	table (1m away)
99	Environment and Personal Protective Equipment Tests for SARS-CoV-2 in the Isolation Room of an Infant With Infection	Yung, CFK, K. Q.; Wong, M. S. Y.; Maiwald, M.; Tan, Y. K.; Tan, B. H.; Thoon, K. C.	Y						asymptomatic baby did contaminate environment
99	Environment and Personal Protective Equipment Tests for SARS-CoV-2 in the Isolation Room of an Infant With Infection	Yung, CFK, K. Q.; Wong, M. S. Y.; Maiwald, M.; Tan, Y. K.; Tan, B. H.; Thoon, K. C.	Y
100	Toilets dominate environmental detection of SARS-CoV-2 virus in a hospital	Ding, Zhen;Qian, Hua;Xu, Bin;Huang, Ying;Miao, Te;Yen, Hui Ling;Xiao, Shenglan;Cui, Lunbiao;Wu, Xiaosong;Shao, Wei;Song, Yan;Sha, Li;Zhou, Lian;Xu, Yan;Zhu, Baoli;Li, Yuguo	N	N	Y	twice daily		China	As title indicates, toilets seem higher risk: 13.5% compared to other surfaces in room at 5.9%	0	12	bedside table																0	6	toilet bowl							2	6	door handle	0	2	fan coil supply louvre
100	Toilets dominate environmental detection of SARS-CoV-2 virus in a hospital	Ding, Zhen;Qian, Hua;Xu, Bin;Huang, Ying;Miao, Te;Yen, Hui Ling;Xiao, Shenglan;Cui, Lunbiao;Wu, Xiaosong;Shao, Wei;Song, Yan;Sha, Li;Zhou, Lian;Xu, Yan;Zhu, Baoli;Li, Yuguo	N						entered rooms with mild symptoms	0	12	bedrail																1	6	toilet seat										0	2	fan coil return air filter
100	Toilets dominate environmental detection of SARS-CoV-2 virus in a hospital	Ding, Zhen;Qian, Hua;Xu, Bin;Huang, Ying;Miao, Te;Yen, Hui Ling;Xiao, Shenglan;Cui, Lunbiao;Wu, Xiaosong;Shao, Wei;Song, Yan;Sha, Li;Zhou, Lian;Xu, Yan;Zhu, Baoli;Li, Yuguo	N						ward door handles also positive																			1	6	underside of toilet lid
100	Toilets dominate environmental detection of SARS-CoV-2 virus in a hospital	Ding, Zhen;Qian, Hua;Xu, Bin;Huang, Ying;Miao, Te;Yen, Hui Ling;Xiao, Shenglan;Cui, Lunbiao;Wu, Xiaosong;Shao, Wei;Song, Yan;Sha, Li;Zhou, Lian;Xu, Yan;Zhu, Baoli;Li, Yuguo	N																									0	6	flush button
100	Toilets dominate environmental detection of SARS-CoV-2 virus in a hospital	Ding, Zhen;Qian, Hua;Xu, Bin;Huang, Ying;Miao, Te;Yen, Hui Ling;Xiao, Shenglan;Cui, Lunbiao;Wu, Xiaosong;Shao, Wei;Song, Yan;Sha, Li;Zhou, Lian;Xu, Yan;Zhu, Baoli;Li, Yuguo	N																									0	3	washbasin flange
100	Toilets dominate environmental detection of SARS-CoV-2 virus in a hospital	Ding, Zhen;Qian, Hua;Xu, Bin;Huang, Ying;Miao, Te;Yen, Hui Ling;Xiao, Shenglan;Cui, Lunbiao;Wu, Xiaosong;Shao, Wei;Song, Yan;Sha, Li;Zhou, Lian;Xu, Yan;Zhu, Baoli;Li, Yuguo	N																									1	3	washbasin tap lever
100	Toilets dominate environmental detection of SARS-CoV-2 virus in a hospital	Ding, Zhen;Qian, Hua;Xu, Bin;Huang, Ying;Miao, Te;Yen, Hui Ling;Xiao, Shenglan;Cui, Lunbiao;Wu, Xiaosong;Shao, Wei;Song, Yan;Sha, Li;Zhou, Lian;Xu, Yan;Zhu, Baoli;Li, Yuguo	N																									0	3	washbasin sink
100	Toilets dominate environmental detection of SARS-CoV-2 virus in a hospital	Ding, Zhen;Qian, Hua;Xu, Bin;Huang, Ying;Miao, Te;Yen, Hui Ling;Xiao, Shenglan;Cui, Lunbiao;Wu, Xiaosong;Shao, Wei;Song, Yan;Sha, Li;Zhou, Lian;Xu, Yan;Zhu, Baoli;Li, Yuguo	N																									1	3	door handle
100	Toilets dominate environmental detection of SARS-CoV-2 virus in a hospital	Ding, Zhen;Qian, Hua;Xu, Bin;Huang, Ying;Miao, Te;Yen, Hui Ling;Xiao, Shenglan;Cui, Lunbiao;Wu, Xiaosong;Shao, Wei;Song, Yan;Sha, Li;Zhou, Lian;Xu, Yan;Zhu, Baoli;Li, Yuguo	N																									1	1	bathroom ceiling exhaust louvre
101	Detection of Air and Surface Contamination by Severe Acute Respiratory Syndrome Coronavirus 2 (SARS-CoV-2) in Hospital Rooms of Infected Patients	Chia, Po Ying;Coleman, Kristen K;Tan, Yian Kim;Ong, Sean Wei Xiang;Gum, Marcus;Lau, Sok Kiang;Sutjipto, Stephanie;Lee, Pei Hua;Son, Than The;Young, Barnaby E;Milton, Donald K;Gray, Gregory C;Schuster, Stephan;Barkham, Timothy;De, Partha Prathim;Vasoo, Shawn;Chan, Monica;Ang, Brenda Sze Peng;Tan, Boon Huan;Leo, Yee Sin;Ng, Oon Tek;Wong, Michelle Su Yen;Marimuthu, Kalisvar	Y	N	Y	twice daily, meaured before		Singapore	only 17/30 demonstrated any enviro contamination at all	7	30	cardiac table							11	30	floor				6	27	chair	5	27	toilet and flush							8	30	locker	3	4	air exhaust vent				0	3	ventilator
101	Detection of Air and Surface Contamination by Severe Acute Respiratory Syndrome Coronavirus 2 (SARS-CoV-2) in Hospital Rooms of Infected Patients	Chia, Po Ying;Coleman, Kristen K;Tan, Yian Kim;Ong, Sean Wei Xiang;Gum, Marcus;Lau, Sok Kiang;Sutjipto, Stephanie;Lee, Pei Hua;Son, Than The;Young, Barnaby E;Milton, Donald K;Gray, Gregory C;Schuster, Stephan;Barkham, Timothy;De, Partha Prathim;Vasoo, Shawn;Chan, Monica;Ang, Brenda Sze Peng;Tan, Boon Huan;Leo, Yee Sin;Ng, Oon Tek;Wong, Michelle Su Yen;Marimuthu, Kalisvar	Y			chlorine tablets; surfaces=5000ppm Nadcc, floor=1000			enviro contamination peaks in first week of symptoms; could be either contact or aerosol deposition	10	30	bedrail																									6	27	switch							0	3	infusion pumps
101	Detection of Air and Surface Contamination by Severe Acute Respiratory Syndrome Coronavirus 2 (SARS-CoV-2) in Hospital Rooms of Infected Patients	Chia, Po Ying;Coleman, Kristen K;Tan, Yian Kim;Ong, Sean Wei Xiang;Gum, Marcus;Lau, Sok Kiang;Sutjipto, Stephanie;Lee, Pei Hua;Son, Than The;Young, Barnaby E;Milton, Donald K;Gray, Gregory C;Schuster, Stephan;Barkham, Timothy;De, Partha Prathim;Vasoo, Shawn;Chan, Monica;Ang, Brenda Sze Peng;Tan, Boon Huan;Leo, Yee Sin;Ng, Oon Tek;Wong, Michelle Su Yen;Marimuthu, Kalisvar	Y						However, contamination through respiratory droplets emitted through coughing and sneezing, as well as through respiratory aerosols, is also plausible. Contamination of surface sites not frequently touched (air exhaust vents and floor) support this latter hypothesis.																																					0	2	pendant
101	Detection of Air and Surface Contamination by Severe Acute Respiratory Syndrome Coronavirus 2 (SARS-CoV-2) in Hospital Rooms of Infected Patients	Chia, Po Ying;Coleman, Kristen K;Tan, Yian Kim;Ong, Sean Wei Xiang;Gum, Marcus;Lau, Sok Kiang;Sutjipto, Stephanie;Lee, Pei Hua;Son, Than The;Young, Barnaby E;Milton, Donald K;Gray, Gregory C;Schuster, Stephan;Barkham, Timothy;De, Partha Prathim;Vasoo, Shawn;Chan, Monica;Ang, Brenda Sze Peng;Tan, Boon Huan;Leo, Yee Sin;Ng, Oon Tek;Wong, Michelle Su Yen;Marimuthu, Kalisvar	Y																																											0	3	screen
102	Aerosol and Surface Distribution of Severe Acute Respiratory Syndrome Coronavirus 2 in Hospital Wards, Wuhan, China, 2020	Guo, ZDW, Z. Y.; Zhang, S. F.; Li, X.; Li, L.; Li, C.; Cui, Y.; Fu, R. B.; Dong, Y. Z.; Chi, X. Y.; Zhang, M. Y.; Liu, K.; Cao, C.; Liu, B.; Zhang, K.; Gao, Y. W.; Lu, B.; Chen, W.	Y	N	N			China	Contamination was greater in intensive care units than general wards	6	8	bedrail							7	10	isolation ward floor													6	8	computer mouse				8	12	air outlet filter
102	Aerosol and Surface Distribution of Severe Acute Respiratory Syndrome Coronavirus 2 in Hospital Wards, Wuhan, China, 2020	Guo, ZDW, Z. Y.; Zhang, S. F.; Li, X.; Li, L.; Li, C.; Cui, Y.; Fu, R. B.; Dong, Y. Z.; Chi, X. Y.; Zhang, M. Y.; Liu, K.; Cao, C.; Liu, B.; Zhang, K.; Gao, Y. W.; Lu, B.; Chen, W.	Y						clean area was clean
102	Aerosol and Surface Distribution of Severe Acute Respiratory Syndrome Coronavirus 2 in Hospital Wards, Wuhan, China, 2020	Guo, ZDW, Z. Y.; Zhang, S. F.; Li, X.; Li, L.; Li, C.; Cui, Y.; Fu, R. B.; Dong, Y. Z.; Chi, X. Y.; Zhang, M. Y.; Liu, K.; Cao, C.; Liu, B.; Zhang, K.; Gao, Y. W.; Lu, B.; Chen, W.	Y						recommend disinfecting shoes and patient masks (before discarding)
102	Aerosol and Surface Distribution of Severe Acute Respiratory Syndrome Coronavirus 2 in Hospital Wards, Wuhan, China, 2020	Guo, ZDW, Z. Y.; Zhang, S. F.; Li, X.; Li, L.; Li, C.; Cui, Y.; Fu, R. B.; Dong, Y. Z.; Chi, X. Y.; Zhang, M. Y.; Liu, K.; Cao, C.; Liu, B.; Zhang, K.; Gao, Y. W.; Lu, B.; Chen, W.	Y
103	SARS-CoV-2 RNA detection of hospital isolation wards hygiene monitoring during the Coronavirus Disease 2019 outbreak in a Chinese hospital	Wang, JF, Haiting; Zhang, Sheng; Ni, Zuowei; Ni, Lingmei; Chen, Yu; Zhuo, Lixin; Zhong, Zifeng; Qu, Tingting	Y	N	Y	4hrs		China	Positive sewage was nonviable via culture	0	2	nightstand																																		0	2	monitor screens
103	SARS-CoV-2 RNA detection of hospital isolation wards hygiene monitoring during the Coronavirus Disease 2019 outbreak in a Chinese hospital	Wang, JF, Haiting; Zhang, Sheng; Ni, Zuowei; Ni, Lingmei; Chen, Yu; Zhuo, Lixin; Zhong, Zifeng; Qu, Tingting	Y						sodium hypochlorite used for sewage disinfection	0	4	bedrail
103	SARS-CoV-2 RNA detection of hospital isolation wards hygiene monitoring during the Coronavirus Disease 2019 outbreak in a Chinese hospital	Wang, JF, Haiting; Zhang, Sheng; Ni, Zuowei; Ni, Lingmei; Chen, Yu; Zhuo, Lixin; Zhong, Zifeng; Qu, Tingting	Y
104	Environmental contamination of SARS-CoV-2 during the COVID-19 outbreak in South Korea.	Ryu, Byung-Han;Cho, Younghwa;Cho, Oh-Hyun;Hong, Sun In;Kim, Sunjoo;Lee, Seungjun	Y	N	Y	1-8 days		South Korea	the isolation room for severe patient was more contaminated than common hospital room for asymptomatic patients	2	13	bedrail	1	1	pillow	1	4	head of bed	1	1	floor	0	4	window				1	3	toilet seat				1	3	television	0	5	door button	1	5	air exhaust damper				1	2	ambu bag	0
104	Environmental contamination of SARS-CoV-2 during the COVID-19 outbreak in South Korea.	Ryu, Byung-Han;Cho, Younghwa;Cho, Oh-Hyun;Hong, Sun In;Kim, Sunjoo;Lee, Seungjun	Y			sporadic; lack of PPE meant that rooms were not entered/cleaned every day				0	1	nurse call controller				0	3	foot of bed				0	1	wall				0	2	air exhaust damper							0	2	door knob							0	4	blood pressure cuff
104	Environmental contamination of SARS-CoV-2 during the COVID-19 outbreak in South Korea.	Ryu, Byung-Han;Cho, Younghwa;Cho, Oh-Hyun;Hong, Sun In;Kim, Sunjoo;Lee, Seungjun	Y																									0	2	exterior doorknob																1	2	infusion pump
104	Environmental contamination of SARS-CoV-2 during the COVID-19 outbreak in South Korea.	Ryu, Byung-Han;Cho, Younghwa;Cho, Oh-Hyun;Hong, Sun In;Kim, Sunjoo;Lee, Seungjun	Y																									0	1	toilet paper holder																2	5	patient monitor
104	Environmental contamination of SARS-CoV-2 during the COVID-19 outbreak in South Korea.	Ryu, Byung-Han;Cho, Younghwa;Cho, Oh-Hyun;Hong, Sun In;Kim, Sunjoo;Lee, Seungjun	Y																									0	2	toilet bowl																0	2	suction bottle
104	Environmental contamination of SARS-CoV-2 during the COVID-19 outbreak in South Korea.	Ryu, Byung-Han;Cho, Younghwa;Cho, Oh-Hyun;Hong, Sun In;Kim, Sunjoo;Lee, Seungjun	Y																									0	1	interior doorknob																0	1	ventilator monitor
104	Environmental contamination of SARS-CoV-2 during the COVID-19 outbreak in South Korea.	Ryu, Byung-Han;Cho, Younghwa;Cho, Oh-Hyun;Hong, Sun In;Kim, Sunjoo;Lee, Seungjun	Y																																											1	2	fluid stand
104	Environmental contamination of SARS-CoV-2 during the COVID-19 outbreak in South Korea.	Ryu, Byung-Han;Cho, Younghwa;Cho, Oh-Hyun;Hong, Sun In;Kim, Sunjoo;Lee, Seungjun	Y																																											0	2	nasal cannula
105	Detection of Novel Coronavirus on the Surface of Environmental Materials Contaminated by COVID-19 Patients in the Republic of Korea	Lee, S-EL, Deog-Yong; Lee, Wook-Gyo; Kang, ByeongHak; Jang, Yoon Suk; Ryu, Boyeong; Lee, SeungJae; Bahk, Hyunjung; Lee, Eungyu	Y	N	Y			South Korea	general and long term hospitals, clinic	0	15	bedrail	0	5	pillow and blanket							0	8	closet	0	5	chair							0	1	telephone	0	1	switch							0	1	aqueous hanger
105	Detection of Novel Coronavirus on the Surface of Environmental Materials Contaminated by COVID-19 Patients in the Republic of Korea	Lee, S-EL, Deog-Yong; Lee, Wook-Gyo; Kang, ByeongHak; Jang, Yoon Suk; Ryu, Boyeong; Lee, SeungJae; Bahk, Hyunjung; Lee, Eungyu	Y																			0	4	wall	0	2	refrigerator							0	2	remote control
105	Detection of Novel Coronavirus on the Surface of Environmental Materials Contaminated by COVID-19 Patients in the Republic of Korea	Lee, S-EL, Deog-Yong; Lee, Wook-Gyo; Kang, ByeongHak; Jang, Yoon Suk; Ryu, Boyeong; Lee, SeungJae; Bahk, Hyunjung; Lee, Eungyu	Y
106	Environmental Contamination of SARS-CoV-2 in Healthcare Premises	Ye, GL, Hualiang; Chen, Liangjun; Wang, Shichan; Zeng, Zhikun; Wang, Wei; Zhang, Shiyu; Rebmann, Terri; Li, Yirong; Pan, Zhenyu; Yang, Zhonghua; Wang, Ying; Wang, Fubing; Qian, Zhengmin; Wang, Xinghuan	Y	N	N			China	feb 7-27; article mentioned spread would probably have been worse at beginning of outbreak
106	Environmental Contamination of SARS-CoV-2 in Healthcare Premises	Ye, GL, Hualiang; Chen, Liangjun; Wang, Shichan; Zeng, Zhikun; Wang, Wei; Zhang, Shiyu; Rebmann, Terri; Li, Yirong; Pan, Zhenyu; Yang, Zhonghua; Wang, Ying; Wang, Fubing; Qian, Zhengmin; Wang, Xinghuan	Y
106	Environmental Contamination of SARS-CoV-2 in Healthcare Premises	Ye, GL, Hualiang; Chen, Liangjun; Wang, Shichan; Zeng, Zhikun; Wang, Wei; Zhang, Shiyu; Rebmann, Terri; Li, Yirong; Pan, Zhenyu; Yang, Zhonghua; Wang, Ying; Wang, Fubing; Qian, Zhengmin; Wang, Xinghuan	Y
107	Air and environmental sampling for SARS-CoV-2 around hospitalized patients with coronavirus disease 2019 (COVID-19).	Cheng, Vincent Chi-Chung;Wong, Shuk-Ching;Chan, Veronica Wing-Man;So, Simon Yung-Chun;Chen, Jonathan Hon-Kwan;Yip, Cyril Chik-Yan;Chan, Kwok-Hung;Chu, Hin;Chung, Tom Wai-Hin;Sridhar, Siddharth;To, Kelvin Kai-Wang;Chan, Jasper Fuk-Woo;Hung, Ivan Fan-Ngai;Ho, Pak-Leung;Yuen, Kwok-Yung	Y	N	Y	daily		China		4	74	bedrail																4	76	exterior toilet door handle	6	77	patient cell phone				2	74	locker
107	Air and environmental sampling for SARS-CoV-2 around hospitalized patients with coronavirus disease 2019 (COVID-19).	Cheng, Vincent Chi-Chung;Wong, Shuk-Ching;Chan, Veronica Wing-Man;So, Simon Yung-Chun;Chen, Jonathan Hon-Kwan;Yip, Cyril Chik-Yan;Chan, Kwok-Hung;Chu, Hin;Chung, Tom Wai-Hin;Sridhar, Siddharth;To, Kelvin Kai-Wang;Chan, Jasper Fuk-Woo;Hung, Ivan Fan-Ngai;Ho, Pak-Leung;Yuen, Kwok-Yung	Y							3	76	bed table
108	Environmental Detection of Severe Acute Respiratory Syndrome Coronavirus 2 (SARS-CoV-2) from Medical Equipment in Long-Term Care Facilities undergoing COVID-19 Outbreaks.	Nelson, Atiba;Kassimatis, Jennifer;Estoque, Jay;Yang, Cicely;McKee, Geoff;Bryce, Elizabeth;Hoang, Linda;Daly, Patricia;Lysyshyn, Mark;Hayden, Althea S;Harding, John;Boraston, Suni;Dawar, Meena;Schwandt, Michael	Y	N	N			Canada	Long term care facility
108	Environmental Detection of Severe Acute Respiratory Syndrome Coronavirus 2 (SARS-CoV-2) from Medical Equipment in Long-Term Care Facilities undergoing COVID-19 Outbreaks.	Nelson, Atiba;Kassimatis, Jennifer;Estoque, Jay;Yang, Cicely;McKee, Geoff;Bryce, Elizabeth;Hoang, Linda;Daly, Patricia;Lysyshyn, Mark;Hayden, Althea S;Harding, John;Boraston, Suni;Dawar, Meena;Schwandt, Michael	Y						finding: blood pressure cuffs tested positive
108	Environmental Detection of Severe Acute Respiratory Syndrome Coronavirus 2 (SARS-CoV-2) from Medical Equipment in Long-Term Care Facilities undergoing COVID-19 Outbreaks.	Nelson, Atiba;Kassimatis, Jennifer;Estoque, Jay;Yang, Cicely;McKee, Geoff;Bryce, Elizabeth;Hoang, Linda;Daly, Patricia;Lysyshyn, Mark;Hayden, Althea S;Harding, John;Boraston, Suni;Dawar, Meena;Schwandt, Michael	Y
108	Environmental Detection of Severe Acute Respiratory Syndrome Coronavirus 2 (SARS-CoV-2) from Medical Equipment in Long-Term Care Facilities undergoing COVID-19 Outbreaks.	Nelson, Atiba;Kassimatis, Jennifer;Estoque, Jay;Yang, Cicely;McKee, Geoff;Bryce, Elizabeth;Hoang, Linda;Daly, Patricia;Lysyshyn, Mark;Hayden, Althea S;Harding, John;Boraston, Suni;Dawar, Meena;Schwandt, Michael	Y
108	Environmental Detection of Severe Acute Respiratory Syndrome Coronavirus 2 (SARS-CoV-2) from Medical Equipment in Long-Term Care Facilities undergoing COVID-19 Outbreaks.	Nelson, Atiba;Kassimatis, Jennifer;Estoque, Jay;Yang, Cicely;McKee, Geoff;Bryce, Elizabeth;Hoang, Linda;Daly, Patricia;Lysyshyn, Mark;Hayden, Althea S;Harding, John;Boraston, Suni;Dawar, Meena;Schwandt, Michael	Y
108	Environmental Detection of Severe Acute Respiratory Syndrome Coronavirus 2 (SARS-CoV-2) from Medical Equipment in Long-Term Care Facilities undergoing COVID-19 Outbreaks.	Nelson, Atiba;Kassimatis, Jennifer;Estoque, Jay;Yang, Cicely;McKee, Geoff;Bryce, Elizabeth;Hoang, Linda;Daly, Patricia;Lysyshyn, Mark;Hayden, Althea S;Harding, John;Boraston, Suni;Dawar, Meena;Schwandt, Michael	Y
108	Environmental Detection of Severe Acute Respiratory Syndrome Coronavirus 2 (SARS-CoV-2) from Medical Equipment in Long-Term Care Facilities undergoing COVID-19 Outbreaks.	Nelson, Atiba;Kassimatis, Jennifer;Estoque, Jay;Yang, Cicely;McKee, Geoff;Bryce, Elizabeth;Hoang, Linda;Daly, Patricia;Lysyshyn, Mark;Hayden, Althea S;Harding, John;Boraston, Suni;Dawar, Meena;Schwandt, Michael	Y
108	Environmental Detection of Severe Acute Respiratory Syndrome Coronavirus 2 (SARS-CoV-2) from Medical Equipment in Long-Term Care Facilities undergoing COVID-19 Outbreaks.	Nelson, Atiba;Kassimatis, Jennifer;Estoque, Jay;Yang, Cicely;McKee, Geoff;Bryce, Elizabeth;Hoang, Linda;Daly, Patricia;Lysyshyn, Mark;Hayden, Althea S;Harding, John;Boraston, Suni;Dawar, Meena;Schwandt, Michael	Y
108	Environmental Detection of Severe Acute Respiratory Syndrome Coronavirus 2 (SARS-CoV-2) from Medical Equipment in Long-Term Care Facilities undergoing COVID-19 Outbreaks.	Nelson, Atiba;Kassimatis, Jennifer;Estoque, Jay;Yang, Cicely;McKee, Geoff;Bryce, Elizabeth;Hoang, Linda;Daly, Patricia;Lysyshyn, Mark;Hayden, Althea S;Harding, John;Boraston, Suni;Dawar, Meena;Schwandt, Michael	Y
108	Environmental Detection of Severe Acute Respiratory Syndrome Coronavirus 2 (SARS-CoV-2) from Medical Equipment in Long-Term Care Facilities undergoing COVID-19 Outbreaks.	Nelson, Atiba;Kassimatis, Jennifer;Estoque, Jay;Yang, Cicely;McKee, Geoff;Bryce, Elizabeth;Hoang, Linda;Daly, Patricia;Lysyshyn, Mark;Hayden, Althea S;Harding, John;Boraston, Suni;Dawar, Meena;Schwandt, Michael	Y
108	Environmental Detection of Severe Acute Respiratory Syndrome Coronavirus 2 (SARS-CoV-2) from Medical Equipment in Long-Term Care Facilities undergoing COVID-19 Outbreaks.	Nelson, Atiba;Kassimatis, Jennifer;Estoque, Jay;Yang, Cicely;McKee, Geoff;Bryce, Elizabeth;Hoang, Linda;Daly, Patricia;Lysyshyn, Mark;Hayden, Althea S;Harding, John;Boraston, Suni;Dawar, Meena;Schwandt, Michael	Y
108	Environmental Detection of Severe Acute Respiratory Syndrome Coronavirus 2 (SARS-CoV-2) from Medical Equipment in Long-Term Care Facilities undergoing COVID-19 Outbreaks.	Nelson, Atiba;Kassimatis, Jennifer;Estoque, Jay;Yang, Cicely;McKee, Geoff;Bryce, Elizabeth;Hoang, Linda;Daly, Patricia;Lysyshyn, Mark;Hayden, Althea S;Harding, John;Boraston, Suni;Dawar, Meena;Schwandt, Michael	Y
108	Environmental Detection of Severe Acute Respiratory Syndrome Coronavirus 2 (SARS-CoV-2) from Medical Equipment in Long-Term Care Facilities undergoing COVID-19 Outbreaks.	Nelson, Atiba;Kassimatis, Jennifer;Estoque, Jay;Yang, Cicely;McKee, Geoff;Bryce, Elizabeth;Hoang, Linda;Daly, Patricia;Lysyshyn, Mark;Hayden, Althea S;Harding, John;Boraston, Suni;Dawar, Meena;Schwandt, Michael	Y
108	Environmental Detection of Severe Acute Respiratory Syndrome Coronavirus 2 (SARS-CoV-2) from Medical Equipment in Long-Term Care Facilities undergoing COVID-19 Outbreaks.	Nelson, Atiba;Kassimatis, Jennifer;Estoque, Jay;Yang, Cicely;McKee, Geoff;Bryce, Elizabeth;Hoang, Linda;Daly, Patricia;Lysyshyn, Mark;Hayden, Althea S;Harding, John;Boraston, Suni;Dawar, Meena;Schwandt, Michael	Y
109	Containing COVID-19 outside the isolation ward: the impact of an infection control bundle on environmental contamination and transmission in a cohorted general ward.	Liang En Ian, Wee;Sim, Xiang Ying Jean;Conceicao, Edwin Philip;Aung, May Kyawt;Tan, Kwee Yuen;Ko, Kwan Ki Karrie;Wong, Hei Man;Wijaya, Limin;Tan, Ban Hock;Venkatachalam, Indumathi;Ling, Moi Lin	Y	N	N			Singapore	Singapore General Hospital							5	NR	Swab of foot of bed and cot side										1	NR	bathroom drain							1	NR	call bell
	Surface Total									59	368		14	33		1	9		20	48		2	39		9	45		18	200		6	81		7	16		22	182		14	36		5	5		5	40		2
	Surface Percent									16.0326			42.4242			11.1111			41.6667			5.12821			20			9			7.40741			43.75			12.0879			38.8889			100			12.5			16.6667
	Setting Total									349	2417
	Setting Percent									14.4394
[truncated: 50 more columns]

## Sheet: 2.Household
Source Number	Title	Author	Peer Reviewed	Tested Infectivity	Reported Prior Disinfection	Time Since Last Disinfection	Change After Disinfection	Country	Setting Notes	P:Hard Bed	Total	Note	P:Floor	Total	Note	P:Non-Floor	Total	Note	P:Hard Furniture	Total	Note	P:Fabric	Total	Note	P:Bathroom	Total	Note	P:Electronics	Total	Note	P:HTS	Total	Note	P:HVAC	Total	Note	P:Food/Utensils	Total	Note	P:Other	Total	Note
110	SARS-CoV-2 in environmental samples of quarantined households	Dohla, Manuel;Wilbring, Gero;Schulte, Biance;Kummerer, Beate Mareike;Diegmann, Christin;Sib, Esther;Richter, Enrico;Haag, Alexandra;Engelhart, Steffen;Eis Hubinger, Anna Maria;Exner, Martin;Streeck, Hendrik;Schmithausen, Ricarda Maria	N	N	N			Germany	Quarantined households										1	19	furniture and furnishing	0	2	clothing				1	52	electronic devices	2	31	knobs and handles				0	4	foods and drinks	0	11	plants and animals
111	Environmental Contamination of SARS-CoV-2 in a Non-Healthcare Setting Revealed by Sensitive Nested RT-PCR	Wong, Judith Chui Ching;Hapuarachichi, Hapuarachchige Chanditha;Arivalan, Sathish;Tien, Wei Ping;Koo, Carmen;Mailepessov, Diyar;Kong, Marcella;Nazeem, Mohammad;Lim, Merrill;Ng, Lee Ching	N	N	Y	same day	absent/absent	Singapore	home residence room	0	2	headboard	0	2	floor	0	7	window panels and handles	0	2	chairs and armrests				0	2	door handle	0	6	television remote and computer controls	0	2	switches	0	6	AC Filters and vents	0	2	cups	0	2	travel items
111	Environmental Contamination of SARS-CoV-2 in a Non-Healthcare Setting Revealed by Sensitive Nested RT-PCR	Wong, Judith Chui Ching;Hapuarachichi, Hapuarachchige Chanditha;Arivalan, Sathish;Tien, Wei Ping;Koo, Carmen;Mailepessov, Diyar;Kong, Marcella;Nazeem, Mohammad;Lim, Merrill;Ng, Lee Ching	N							0	2	bedside wall							0	2	tables				0	1	shower door handle
111	Environmental Contamination of SARS-CoV-2 in a Non-Healthcare Setting Revealed by Sensitive Nested RT-PCR	Wong, Judith Chui Ching;Hapuarachichi, Hapuarachchige Chanditha;Arivalan, Sathish;Tien, Wei Ping;Koo, Carmen;Mailepessov, Diyar;Kong, Marcella;Nazeem, Mohammad;Lim, Merrill;Ng, Lee Ching	N																0	2	warddrobe				0	2	sink rim
111	Environmental Contamination of SARS-CoV-2 in a Non-Healthcare Setting Revealed by Sensitive Nested RT-PCR	Wong, Judith Chui Ching;Hapuarachichi, Hapuarachchige Chanditha;Arivalan, Sathish;Tien, Wei Ping;Koo, Carmen;Mailepessov, Diyar;Kong, Marcella;Nazeem, Mohammad;Lim, Merrill;Ng, Lee Ching	N																						0	1	sink tap
111	Environmental Contamination of SARS-CoV-2 in a Non-Healthcare Setting Revealed by Sensitive Nested RT-PCR	Wong, Judith Chui Ching;Hapuarachichi, Hapuarachchige Chanditha;Arivalan, Sathish;Tien, Wei Ping;Koo, Carmen;Mailepessov, Diyar;Kong, Marcella;Nazeem, Mohammad;Lim, Merrill;Ng, Lee Ching	N																						0	2	toilet bowl/rim
111	Environmental Contamination of SARS-CoV-2 in a Non-Healthcare Setting Revealed by Sensitive Nested RT-PCR	Wong, Judith Chui Ching;Hapuarachichi, Hapuarachchige Chanditha;Arivalan, Sathish;Tien, Wei Ping;Koo, Carmen;Mailepessov, Diyar;Kong, Marcella;Nazeem, Mohammad;Lim, Merrill;Ng, Lee Ching	N																						0	1	toilet flush
111	Environmental Contamination of SARS-CoV-2 in a Non-Healthcare Setting Revealed by Sensitive Nested RT-PCR	Wong, Judith Chui Ching;Hapuarachichi, Hapuarachchige Chanditha;Arivalan, Sathish;Tien, Wei Ping;Koo, Carmen;Mailepessov, Diyar;Kong, Marcella;Nazeem, Mohammad;Lim, Merrill;Ng, Lee Ching	N																						0	2	toilet seat
	Surface Total									0	4		0	2		0	7		1	25		0	2		0	11		1	58		2	33		0	6		0	6		0	13
	Surface Percent									0			0			0			4			0			0			1.72414			6.06061			0			0			0
	Setting Total									4	161
	Setting Percent									2.48447

## Sheet: 3.Non-Household Accommodations
Source Number	Title	Author	Peer Reviewed	Tested Infectivity	Reported Prior Disinfection	Time Since Last Disinfection	Change After Disinfection	Country	Setting Notes	P:Hard Bed	Total	Note	P:Soft Bed	Total	Note	P:Floor	Total	Note	P:Non-Floor	Total	Note	P:Hard Furniture	Total	Note	P:Bathroom	Total	Note	P:Electronics	Total	Note	P:High Touch Surfaces	Total	Note	P:HVAC	Total	Note	P:Food/Utensils	Total	Note	P:Other	Total	Note
105	Detection of Novel Coronavirus on the Surface of Environmental Materials Contaminated by COVID-19 Patients in the Republic of Korea.	Lee, Sang-Eun;Lee, Deog-Yong;Lee, Wook-Gyo;Kang, ByeongHak;Jang, Yoon Suk;Ryu, Boyeong;Lee, SeungJae;Bahk, Hyunjung;Lee, Eungyu	Y	N	N			South Korea	Mass facilities (rehab center, apartment houses, only rehab positive)																						2	12	door handle
111	Environmental Contamination of SARS-CoV-2 in a Non-Healthcare Setting Revealed by Sensitive Nested RT-PCR	Wong, Judith Chui Ching;Hapuarachichi, Hapuarachchige Chanditha;Arivalan, Sathish;Tien, Wei Ping;Koo, Carmen;Mailepessov, Diyar;Kong, Marcella;Nazeem, Mohammad;Lim, Merrill;Ng, Lee Ching	N	N	Y	same day	present/absent	Singapore	commercial boarding room, elevators of public housing	1	1	bed handle				0	6	elevator floors	0	12	exterior elevator doors	0	2	chairs and armrests	0	6	exhaust vents	0	1	phone	0	2	door handles	0	7	AC filters and vents	0	1	cups	0	1	travel items
111	Environmental Contamination of SARS-CoV-2 in a Non-Healthcare Setting Revealed by Sensitive Nested RT-PCR	Wong, Judith Chui Ching;Hapuarachichi, Hapuarachchige Chanditha;Arivalan, Sathish;Tien, Wei Ping;Koo, Carmen;Mailepessov, Diyar;Kong, Marcella;Nazeem, Mohammad;Lim, Merrill;Ng, Lee Ching	N							1	2	headboard							0	24	interior elevator walls	0	3	tables	0	6	door handle	0	1	television remote and computer controls	0	1	safe buttons
111	Environmental Contamination of SARS-CoV-2 in a Non-Healthcare Setting Revealed by Sensitive Nested RT-PCR	Wong, Judith Chui Ching;Hapuarachichi, Hapuarachchige Chanditha;Arivalan, Sathish;Tien, Wei Ping;Koo, Carmen;Mailepessov, Diyar;Kong, Marcella;Nazeem, Mohammad;Lim, Merrill;Ng, Lee Ching	N							0	2	bedside wall							0	6	interior elevator doors				0	7	shower door handle				0	4	switches
111	Environmental Contamination of SARS-CoV-2 in a Non-Healthcare Setting Revealed by Sensitive Nested RT-PCR	Wong, Judith Chui Ching;Hapuarachichi, Hapuarachchige Chanditha;Arivalan, Sathish;Tien, Wei Ping;Koo, Carmen;Mailepessov, Diyar;Kong, Marcella;Nazeem, Mohammad;Lim, Merrill;Ng, Lee Ching	N																						0	7	sink rim				0	21	elevator buttons
111	Environmental Contamination of SARS-CoV-2 in a Non-Healthcare Setting Revealed by Sensitive Nested RT-PCR	Wong, Judith Chui Ching;Hapuarachichi, Hapuarachchige Chanditha;Arivalan, Sathish;Tien, Wei Ping;Koo, Carmen;Mailepessov, Diyar;Kong, Marcella;Nazeem, Mohammad;Lim, Merrill;Ng, Lee Ching	N																						0	7	sink tap				0	18	elevator handles
111	Environmental Contamination of SARS-CoV-2 in a Non-Healthcare Setting Revealed by Sensitive Nested RT-PCR	Wong, Judith Chui Ching;Hapuarachichi, Hapuarachchige Chanditha;Arivalan, Sathish;Tien, Wei Ping;Koo, Carmen;Mailepessov, Diyar;Kong, Marcella;Nazeem, Mohammad;Lim, Merrill;Ng, Lee Ching	N																						0	7	toilet bowl/rim
111	Environmental Contamination of SARS-CoV-2 in a Non-Healthcare Setting Revealed by Sensitive Nested RT-PCR	Wong, Judith Chui Ching;Hapuarachichi, Hapuarachchige Chanditha;Arivalan, Sathish;Tien, Wei Ping;Koo, Carmen;Mailepessov, Diyar;Kong, Marcella;Nazeem, Mohammad;Lim, Merrill;Ng, Lee Ching	N																						0	7	toilet flush
111	Environmental Contamination of SARS-CoV-2 in a Non-Healthcare Setting Revealed by Sensitive Nested RT-PCR	Wong, Judith Chui Ching;Hapuarachichi, Hapuarachchige Chanditha;Arivalan, Sathish;Tien, Wei Ping;Koo, Carmen;Mailepessov, Diyar;Kong, Marcella;Nazeem, Mohammad;Lim, Merrill;Ng, Lee Ching	N																						0	2	toilet seat
112	Environmental contamination by SARS-CoV-2 of an imported case during incubation period.	Hu, Xiaowen;Xing, Yuhan;Ni, Wei;Zhang, Feng;Lu, Sheyu;Wang, Zhaoguo;Gao, Ruqin;Jiang, Fachun	Y	N	Y	same day	Present/reduced	China	quarantine room				0	1	pillow	1	1	floor	0	1	bay window	1	1	desktop	0	1	bathroom door knob	0	1	TV	0	1	bedroom door knob				1	1	cup
112	Environmental contamination by SARS-CoV-2 of an imported case during incubation period.	Hu, Xiaowen;Xing, Yuhan;Ni, Wei;Zhang, Feng;Lu, Sheyu;Wang, Zhaoguo;Gao, Ruqin;Jiang, Fachun	Y										1	1	top sheet				0	1	closet	1	1	chair	1	1	inner surface of washbowl	0	1	tv remote controller	1	1	light switch
112	Environmental contamination by SARS-CoV-2 of an imported case during incubation period.	Hu, Xiaowen;Xing, Yuhan;Ni, Wei;Zhang, Feng;Lu, Sheyu;Wang, Zhaoguo;Gao, Ruqin;Jiang, Fachun	Y										1	1	bottom sheet										1	1	inner surface of toilet	0	1	ac remote controller	0	1	table lamp
112	Environmental contamination by SARS-CoV-2 of an imported case during incubation period.	Hu, Xiaowen;Xing, Yuhan;Ni, Wei;Zhang, Feng;Lu, Sheyu;Wang, Zhaoguo;Gao, Ruqin;Jiang, Fachun	Y										0	1	mattress										0	1	toilet lid	0	1	telephone
112	Environmental contamination by SARS-CoV-2 of an imported case during incubation period.	Hu, Xiaowen;Xing, Yuhan;Ni, Wei;Zhang, Feng;Lu, Sheyu;Wang, Zhaoguo;Gao, Ruqin;Jiang, Fachun	Y																						0	1	toilet button
112	Environmental contamination by SARS-CoV-2 of an imported case during incubation period.	Hu, Xiaowen;Xing, Yuhan;Ni, Wei;Zhang, Feng;Lu, Sheyu;Wang, Zhaoguo;Gao, Ruqin;Jiang, Fachun	Y																						1	1	sewer inlet
113	Environmental sampling for severe acute respiratory syndrome coronavirus 2 (SARS-CoV-2) during a coronavirus disease (COVID-19) outbreak aboard a commercial cruise ship	Outbreak, Taskforce For The Covid 19 Cruise Ship;Yamagishi, Takuya	N	N	N			docked in Japan	cruise cabins				11	32	pillow							8	34	table	13	33	floor around toilet in the bathroom	8	33	phone	1	33	light switch
113	Environmental sampling for severe acute respiratory syndrome coronavirus 2 (SARS-CoV-2) during a coronavirus disease (COVID-19) outbreak aboard a commercial cruise ship	Outbreak, Taskforce For The Covid 19 Cruise Ship;Yamagishi, Takuya	N																			4	33	chair arm	2	33	toilet flush button	7	33	tv remote control	1	33	door knob
113	Environmental sampling for severe acute respiratory syndrome coronavirus 2 (SARS-CoV-2) during a coronavirus disease (COVID-19) outbreak aboard a commercial cruise ship	Outbreak, Taskforce For The Covid 19 Cruise Ship;Yamagishi, Takuya	N																						2	33	toilet seat
114	Detection of Severe Acute Respiratory Syndrome Coronavirus 2 RNA on Surfaces in Quarantine Rooms	Jiang, FCJ, X. L.; Wang, Z. G.; Meng, Z. H.; Shao, S. F.; Anderson, B. D.; Ma, M. J.	Y	N	N			China	quarantine room				2	2	pillow cover	1	2	towel							1	2	bathroom door handle	0	2	tv remote	0	2	door handle							0	2	thermometer
114	Detection of Severe Acute Respiratory Syndrome Coronavirus 2 RNA on Surfaces in Quarantine Rooms	Jiang, FCJ, X. L.; Wang, Z. G.; Meng, Z. H.; Shao, S. F.; Anderson, B. D.; Ma, M. J.	Y										1	2	duvet cover										0	2	toilet seat, flush handle				1	2	light switch
114	Detection of Severe Acute Respiratory Syndrome Coronavirus 2 RNA on Surfaces in Quarantine Rooms	Jiang, FCJ, X. L.; Wang, Z. G.; Meng, Z. H.; Shao, S. F.; Anderson, B. D.; Ma, M. J.	Y										1	2	sheet																1	2	faucet
	Surface Total									2	5		17	42		2	9		0	44		14	74		21	158		15	74		5	121		0	7		1	2		0	3
	Surface Percent									40			40.4762			22.2222			0			18.9189			13.2911			20.2703			4.13223			0			50			0
	Setting Total									76	537
	Setting Percent									14.1527

## Sheet: 4.Other Shared
										Laboratory	Laboratory	Laboratory	Laboratory	Laboratory	Laboratory	Laboratory	Laboratory	Laboratory	Laboratory	Laboratory	Laboratory	Laboratory	Laboratory	Laboratory	Laboratory	Laboratory	Laboratory	Laboratory	Laboratory	Laboratory	Laboratory	Laboratory	Laboratory	Indoor	Indoor	Indoor	Indoor	Indoor	Indoor	Indoor	Indoor	Indoor	Indoor	Indoor	Indoor				Outdoor
Source Number	Title	Author	Peer Reviewed	Tested Infectivity	Reported Prior Disinf	Time Since Last Disinf	Change After Disinf	Country	Setting and Discussion Notes	P:Floor	T	Note	P:NonFloor	T	Note	P:Hard Furniture	T	Note	P:Lab Equipment	T	Note	P:ElectronicHTS	T	Note	P:Personal Electronics	T	Note	P:Non-E HTS	T	Note	P:PPE	T	Note	P:Bathroom	Total	Note	P:Hard Furniture	Total	Note	P:Electronic HTS	Total	Note	P:Non-E HTS	Total	Note	P:Other	Total	Note	P:Pedestrian Surface
115	Detection of SARS-CoV-2 RNA residue on object surfaces in nucleic acid testing laboratory using droplet digital PCR.	Lv, Jun;Yang, Jin;Xue, Juan;Zhu, Ping;Liu, Lanfang;Li, Shan	Y	N				China	Laboratory	0	1	contaminated area floor	0	1	Inner wall of transfer window	0	1	table	2	8	sample transport box							0	1	door handle	2	2	outer gloves
115	Detection of SARS-CoV-2 RNA residue on object surfaces in nucleic acid testing laboratory using droplet digital PCR.	Lv, Jun;Yang, Jin;Xue, Juan;Zhu, Ping;Liu, Lanfang;Li, Shan	Y						All samples negative by qtPCR, 13/61 positive by ddPCR	0	1	semi-contaminated area floor				0	2	chair	0	5	BSC interior							0	3	elevator buttons	1	2	goggles
115	Detection of SARS-CoV-2 RNA residue on object surfaces in nucleic acid testing laboratory using droplet digital PCR.	Lv, Jun;Yang, Jin;Xue, Juan;Zhu, Ping;Liu, Lanfang;Li, Shan	Y						Evidence that glove contact with surfaces was main route of transmission	0	1	clean area floor							3	3	pipettes							0	1	sample handover record book	0	2	protective clothing
115	Detection of SARS-CoV-2 RNA residue on object surfaces in nucleic acid testing laboratory using droplet digital PCR.	Lv, Jun;Yang, Jin;Xue, Juan;Zhu, Ping;Liu, Lanfang;Li, Shan	Y																0	1	metal bath							0	2	transfer window door handle	0	2	safety shoes
115	Detection of SARS-CoV-2 RNA residue on object surfaces in nucleic acid testing laboratory using droplet digital PCR.	Lv, Jun;Yang, Jin;Xue, Juan;Zhu, Ping;Liu, Lanfang;Li, Shan	Y																2	5	high speed centrifuge							0	1	BSC Button	1	2	mask
115	Detection of SARS-CoV-2 RNA residue on object surfaces in nucleic acid testing laboratory using droplet digital PCR.	Lv, Jun;Yang, Jin;Xue, Juan;Zhu, Ping;Liu, Lanfang;Li, Shan	Y																0	2	refrigerator interior							1	1	BSC handle	0	2	inner gloves																ti
115	Detection of SARS-CoV-2 RNA residue on object surfaces in nucleic acid testing laboratory using droplet digital PCR.	Lv, Jun;Yang, Jin;Xue, Juan;Zhu, Ping;Liu, Lanfang;Li, Shan	Y																0	2	autoclave interior							1	2	refrigerator door handle	0	2	surgical hats
115	Detection of SARS-CoV-2 RNA residue on object surfaces in nucleic acid testing laboratory using droplet digital PCR.	Lv, Jun;Yang, Jin;Xue, Juan;Zhu, Ping;Liu, Lanfang;Li, Shan	Y																0	1	eye washer							0	1	autoclave handle
115	Detection of SARS-CoV-2 RNA residue on object surfaces in nucleic acid testing laboratory using droplet digital PCR.	Lv, Jun;Yang, Jin;Xue, Juan;Zhu, Ping;Liu, Lanfang;Li, Shan	Y																									0	1	faucet
116	Detection of SARS-CoV-2 on high-touch surfaces in a clinical microbiology laboratory.	Bloise, I;Gómez-Arroyo, B;García-Rodríguez, J;	Y	N				Spain	Laboratory													0	1	landline	0	7	personal cell phone
116	Detection of SARS-CoV-2 on high-touch surfaces in a clinical microbiology laboratory.	Bloise, I;Gómez-Arroyo, B;García-Rodríguez, J;	Y						Nucleic acid testing lab; results may be affected by deactivated RNA from extraction													0	4	barcode scanner
116	Detection of SARS-CoV-2 on high-touch surfaces in a clinical microbiology laboratory.	Bloise, I;Gómez-Arroyo, B;García-Rodríguez, J;	Y																			1	2	laboratory cell phone
116	Detection of SARS-CoV-2 on high-touch surfaces in a clinical microbiology laboratory.	Bloise, I;Gómez-Arroyo, B;García-Rodríguez, J;	Y																			2	4	mouse
116	Detection of SARS-CoV-2 on high-touch surfaces in a clinical microbiology laboratory.	Bloise, I;Gómez-Arroyo, B;García-Rodríguez, J;	Y																			1	4	keyboard
117	Detection of SARS-CoV-2 RNA on public surfaces in a densely populated urban area of Brazil	Abrahao, Jonatas Santos;Pengo, Livia Sacchetto;Rezende, Izabela Mauricio;Rodrigues, Rodrigo;Crispim, Ana Paula Correia;Moura, Cesar;Mendonca, Diogo Correa;Reis, Erik;Souza, Fernanda;Oliveira, Gabriela Fernanda Garcia;Domingos, Iago Jose Da Silva;Boratto, Paulo;Silva, Pedro Henrique Bastos E;Queiroz, Victoria Fulgencio;Silva, Thais Barbara De Souza;Oliveira, Graziele Pereira;Alves, Viviane De Souz…	N	N				Brazil	Urban																																								2
117	Detection of SARS-CoV-2 RNA on public surfaces in a densely populated urban area of Brazil	Abrahao, Jonatas Santos;Pengo, Livia Sacchetto;Rezende, Izabela Mauricio;Rodrigues, Rodrigo;Crispim, Ana Paula Correia;Moura, Cesar;Mendonca, Diogo Correa;Reis, Erik;Souza, Fernanda;Oliveira, Gabriela Fernanda Garcia;Domingos, Iago Jose Da Silva;Boratto, Paulo;Silva, Pedro Henrique Bastos E;Queiroz, Victoria Fulgencio;Silva, Thais Barbara De Souza;Oliveira, Graziele Pereira;Alves, Viviane De Souz…	N																																														1
118	SARS-CoV-2 spillover into hospital outdoor environments	Zhang, Dayi;Yang, Yunfeng;Huang, Xia;Jiang, Jingkun;Li, Miao;Zhang, Xian;Ling, Haibo;Li, Jing;Liu, Yi;Li, Guanghe;Li, Weiwei;Yi, Chuan;Zhang, Ting;Jiang, Yongzhong;Xiong, Yan;Hu, Zhenyu;Wang, Xinzi;Deng, Songqiang;Zhao, Peng;Qu, Jiuhui	N	N				China	Outside Hospital																																								0
119	Sentinel Coronavirus Environmental Monitoring Can Contribute to Detecting Asymptomatic SARS-CoV-2 Virus Spreaders and Can Verify Effectiveness of Workplace COVID-19 Controls	Marshall, Douglas;Bois, Frederic;Jensen, Soren K S;Linde, Svend A;Higby, Richard;Remy Mccort, Yvoine;Murray, Sean;Dieckelman, Bryan;Sudradjat, Fitri	N	N				United States, Belgium, Spain, Italy, France, UK	Workplace																									2	NR	men's toilet faucet handle	6	NR	break room chair	2	NR	equipment control panel	5	NR	break room door handle	1	NR	plastic bin
																																		2	NR	women's toilet faucet handle	5	NR	work bench surface	2	NR	photocopier control panel	2	NR	log book
																																					1	NR	office desk	2	NR	computer mouse	2	NR	elevator buttons
																																								2	NR	keyboard	2	NR	file drawer handle
																																											1	NR	entrance push button
																																											1	NR	work bench hot water faucet handle
																																											1	NR	workstation refrigerator door handle
																																											1	NR	stock room exit door handle
																																											1	NR	workspace exit door handle
																																											1	NR	furnace oven door handle
																																											1	NR	office paper hole punch
	Surface Total									0	3		0	1		0	3		7	27		4	15		0	7		2	13		4	14																	3
	Surface Percent									0			0			0			25.9259			26.6667			0			15.3846			28.5714																		4.22535
	Setting Total									37	228
	Setting Percent									16.2281
[truncated: 11 more columns]

## Sheet: Healthcare Summary
All Healthcare
Category	Surface	Pos	Total	Percent
HC-Patient Room	Food/Utensils	5	5	100
HC-Patient Room	Patient PPE	2	3	66.6667
HC-Patient Room	Electronic HTS	7	16	43.75
HC-Patient Room	Soft Bed	14	33	42.4242
HC-Patient Room	Floor	20	48	41.6667
HC-Patient Room	HVAC	14	36	38.8889
HC-Non-Patient Room	Personal Electronic Devices	3	9	33.3333
HC-Non-Patient Room	Bathroom	10	47	21.2766
HC-Patient Room	Other	11	53	20.7547
HC-Patient Room	Hard Furniture	9	45	20
HC-Non-Patient Room	Medical Equipment	19	109	17.4312
HC-Patient Room	Unspec Medical	2	12	16.6667
HC-Patient Room	Hard Bed	59	368	16.0326
HC-Non-Patient Room	Hard Furniture	35	228	15.3509
HC-Non-Patient Room	HVAC	3	20	15
HC-Non-Patient Room	Electronic HTS	32	215	14.8837
HC-Non-Patient Room	Floor	8	60	13.3333
HC-Patient Room	Attached Medical	5	40	12.5
HC-Patient Room	Non-E HTS	22	182	12.0879
HC-Patient Room	Unspecified Bed	1	9	11.1111
HC-Non-Patient Room	HCW PPE	32	346	9.24855
HC-Non-Patient Room	Non-E HTS	25	274	9.12409
HC-Patient Room	Bathroom	18	200	9
HC-Non-Patient Room	Other	6	75	8
HC-Patient Room	Personal Electronic Devices	6	81	7.40741
HC-Patient Room	Non-Floor	2	39	5.12821
HC-Non-Patient Room	Non-Floor	1	36	2.77778
HC-Non-Patient Room	Hard Bed	0	4	0
HC-Non-Patient Room	Unspecified Bed	0	2	0
HC-Non-Patient Room	Personal Vehicle	0	4	0
Patient Room vs Non-Patient Room
Category	Surface	Pos	Total	Percent
HC-Non-Patient Room	Personal Electronic Devices	3	9	33.3333
HC-Non-Patient Room	Bathroom	10	47	21.2766
HC-Non-Patient Room	Medical Equipment	19	109	17.4312
HC-Non-Patient Room	Hard Furniture	35	228	15.3509
HC-Non-Patient Room	HVAC	3	20	15
HC-Non-Patient Room	Electronic HTS	32	215	14.8837
HC-Non-Patient Room	Floor	8	60	13.3333
HC-Non-Patient Room	HCW PPE	32	346	9.24855
HC-Non-Patient Room	Non-E HTS	25	274	9.12409
HC-Non-Patient Room	Other	6	75	8
HC-Non-Patient Room	Non-Floor	1	36	2.77778
HC-Non-Patient Room	Hard Bed	0	4	0
HC-Non-Patient Room	Unspecified Bed	0	2	0
HC-Non-Patient Room	Personal Vehicle	0	4	0
Total		174	1429	12.1763
HC-Patient Room	Food/Utensils	5	5	100
HC-Patient Room	Patient PPE	2	3	66.6667
HC-Patient Room	Electronic HTS	7	16	43.75
HC-Patient Room	Soft Bed	14	33	42.4242
HC-Patient Room	Floor	20	48	41.6667
HC-Patient Room	HVAC	14	36	38.8889
HC-Patient Room	Other	11	53	20.7547
HC-Patient Room	Hard Furniture	9	45	20
HC-Patient Room	Unspec Medical	2	12	16.6667
HC-Patient Room	Hard Bed	59	368	16.0326
HC-Patient Room	Attached Medical	5	40	12.5
HC-Patient Room	Non-E HTS	22	182	12.0879
HC-Patient Room	Unspecified Bed	1	9	11.1111
HC-Patient Room	Bathroom	18	200	9
HC-Patient Room	Personal Electronic Devices	6	81	7.40741
HC-Patient Room	Non-Floor	2	39	5.12821
Total		197	1170	16.8376

## Sheet: Household Summary
Category	Surface	Pos	Total	Percent
Household	Non-E HTS	2	33	6.06061
Household	Hard Furniture	1	25	4
Household	Electronics	1	58	1.72414
Household	Hard Bed	0	4	0
Household	Floor	0	2	0
Household	Non-Floor	0	7	0
Household	Fabric	0	2	0
Household	Bathroom	0	11	0
Household	HVAC	0	6	0
Household	Food/Utensils	0	6	0
Household	Other	0	13	0

## Sheet: Non-Household Accommod. Summary
Category	Surface	Pos	Total	Percent
Non-Household Accommodation	Food/Utensils	1	2	50
Non-Household Accommodation	Soft Bed	17	42	40.4762
Non-Household Accommodation	Hard Bed	2	5	40
Non-Household Accommodation	Floor	2	9	22.2222
Non-Household Accommodation	Electronics	15	74	20.2703
Non-Household Accommodation	Hard Furniture	14	74	18.9189
Non-Household Accommodation	Bathroom	21	158	13.2911
Non-Household Accommodation	Non-E HTS	5	121	4.13223
Non-Household Accommodation	Non-Floor	0	44	0
Non-Household Accommodation	HVAC	0	7	0
Non-Household Accommodation	Other	0	3	0

## Sheet: Other Shared Summary
All Other Shared
Category	Surface	Pos	Total	Percent
OS-Lab	PPE	4	14	28.5714
OS-Lab	Electronic HTS	4	15	26.6667
OS-Lab	Lab Equipment	7	27	25.9259
OS-Outdoor	HTS	6	24	25
OS-Outdoor	Furniture	8	35	22.8571
OS-Outdoor	Soil	3	15	20
OS-Lab	Non-E HTS	2	13	15.3846
OS-Outdoor	Pedestrian Surfaces	3	71	4.22535
OS-Lab	Floor	0	3	0
OS-Lab	Non-Floor	0	1	0
OS-Lab	Hard Furniture	0	3	0
OS-Lab	Personal Electronic Devices	0	7	0
Lab vs Outdoor
Category	Surface	Pos	Total	Percent
OS-Lab	PPE	4	14	28.5714
OS-Lab	Electronic HTS	4	15	26.6667
OS-Lab	Lab Equipment	7	27	25.9259
OS-Lab	Non-E HTS	2	13	15.3846
OS-Lab	Floor	0	3	0
OS-Lab	Non-Floor	0	1	0
OS-Lab	Hard Furniture	0	3	0
OS-Lab	Personal Electronic Devices	0	7	0
Total		17	83	20.4819
OS-Outdoor	HTS	6	24	25
OS-Outdoor	Furniture	8	35	22.8571
OS-Outdoor	Soil	3	15	20
OS-Outdoor	Pedestrian Surfaces	3	71	4.22535
Total		20	145	13.7931

## Sheet: Data Summary
Article Info
Total Articles	Peer Reviewed	Healthcare	Household	Other Living	Other Shared	Did not report denom	Tested Infectivity
35	26	25	2	5	5	2	0
	74.2857	71.4286	5.71429	14.2857	14.2857
				*(2 overlap)
		Total Contamination by Setting
	Setting	Positive	Total	Contamination Ratio (%)
	Healthcare	349	2417	14.4
	Patient Room	197	1170	16.8
	Non-Patient Room	174	1429	12.2
	Household	4	161	2.5
	Other Living	76	537	14.2
	Other Shared	37	228	16.2
	Lab	17	83	20.5
	Outdoor	20	145	13.8
